# Supplementary material
Source: MDPI journal article supplement (https://www.mdpi.com/2311-7524/7/10/380)
Supplement: s1 [file s1]

## Supplementary data

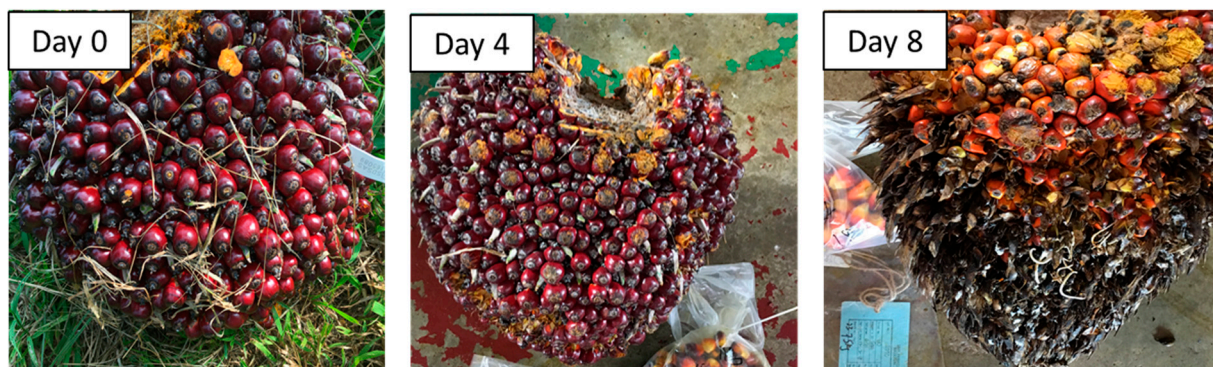

Supplementary Figure S1. Harvested FFB retted up to 8 days without ethephon treatment.

Visible bunch rot and fungal growth was observed on FFB after a week of retting
